# Supplementary material for: Intimate partner violence among pregnant women in Rwanda, its associated risk factors and relationship to ANC services attendance: a population-based study
Source: PubMed Central journal article supplement — BMJ Open. 2017 Feb 21;7(2):e013155. doi: 10.1136/bmjopen-2016-013155 (PMC5337709; doi:10.1136/bmjopen-2016-013155), 2017-02-21
Supplement: bmjopen-2016-013155supp_table.pdf [file bmjopen-2016-013155supp_table.pdf]

**Supplementary table1. Prevalence of physical, sexual and psychological violence experienced by women earlier in life, the year before pregnancy and during pregnancy**  
**N=921.\***

| Type of Violence                                                                        | Ever in life                   | Year before pregnancy         | During pregnancy               |                 |                 | After delivery  |                                |
|-----------------------------------------------------------------------------------------|--------------------------------|-------------------------------|--------------------------------|-----------------|-----------------|-----------------|--------------------------------|
|                                                                                         | n (%)                          | n (%)                         | n (%)                          | 1               | 2-3             | >3              | n (%)                          |
| <b>Physical violence (n=896)</b>                                                        |                                |                               |                                |                 |                 |                 |                                |
| Slapped/throw something at you                                                          | 161 (17.5) 12-123333           | 95 (10.3) 12-123333           | 85 (9.2) 12-123333             | 50 (5.4)        | 13 (1.4)        | 22 (2.4)        | 97 (10.5)                      |
| Pushed/shoved/pulled your hair                                                          | 75 (8.1)                       | 28 (3.0)                      | 38 (4.1)                       | 19 (2.1)        | 6 (0.7)         | 13 (1.4)        | 41 (4.5)                       |
| Hit that could hurt                                                                     | 87 (9.4)                       | 40 (4.3)                      | 42 (4.5)                       | 24 (2.6)        | 4 (0.4)         | 14 (1.5)        | 53 (5.8)                       |
| Kicked/dragged or beating                                                               | 71 (7.7)                       | 30 (3.3)                      | 35 (3.8)                       | 17 (1.8)        | 6 (0.7)         | 12 (1.3)        | 41 (4.5)                       |
| Choked or burnt you on purpose                                                          | 47 (5.1)                       | 14 (1.5)                      | 21 (2.3)                       | 13 (1.4)        | 2 (0.2)         | 6 (0.7)         | 24 (2.6)                       |
| Threaten or used a weapon against you                                                   | 54 (5.9)                       | 15 (1.6)                      | 23 (2.4)                       | 13 (1.4)        | 2 (0.2)         | 8 (0.9)         | 25 (2.7)                       |
| <b>Summary measure of Physical violence</b>                                             | <b>188 (20.4: 17.8-23.0)</b>   | <b>103 (11.2: 9.16-13.24)</b> | <b>94 (10.2: 8.25-12.15)</b>   | <b>60 (6.5)</b> | <b>17 (1.8)</b> | <b>17 (1.8)</b> | <b>111 (12.1: 9.99-14.21)</b>  |
| <b>Psychological abuse (n=909)</b>                                                      |                                |                               |                                |                 |                 |                 |                                |
| Insulted or made you feel bad about yourself                                            | 175 (19.2)                     | 109 (11.8)                    | 145 (15.7)                     | 45 (4.9)        | 39 (4.2)        | 61 (6.6)        | 144 (15.6)                     |
| Belittled or humiliated you in front of others                                          | 75 (8.2)                       | 35 (3.8)                      | 67 (7.3)                       | 24 (2.6)        | 9 (1.0)         | 34 (3.7)        | 76 (8.3)                       |
| Did things to scare or intimidate you purposely                                         | 60 (6.6)                       | 31 (3.4)                      | 59 (6.4)                       | 24 (2.6)        | 8 (0.9)         | 27 (2.9)        | 59 (6.4)                       |
| Threaten to hurt you or someone you cared about                                         | 53 (5.8)                       | 28 (3.0)                      | 48 (5.3)                       | 19 (2.1)        | 6 (0.7)         | 23 (2.5)        | 51 (5.5)                       |
| <b>Summary measure of Psychological abuse</b>                                           | <b>190 (20.6: 17.99-23.21)</b> | <b>123 (13.4: 11.2-15.6)</b>  | <b>157 (17.0: 14.58-19.42)</b> | <b>64 (6.9)</b> | <b>53 (5.7)</b> | <b>40 (4.4)</b> | <b>160 (17.4: 14.95-19.85)</b> |
| <b>Sexual violence (n=909)</b>                                                          |                                |                               |                                |                 |                 |                 |                                |
| Physically forced you to have sexual intercourse                                        | 94 (10.2)                      | 66 (7.2)                      | 76 (8.3)                       | 25 (2.7)        | 19 (2.1)        | 32 (3.5)        | 80 (8.7)                       |
| Did you have sexual intercourse you did not want because you feared what he might to do | 89 (9.7)                       | 58 (6.3)                      | 69 (7.4)                       | 24 (2.6)        | 17 (1.8)        | 28 (3.0)        | 78 (8.5)                       |
| Did he force you to do something sexual that felt degrading or humiliating              | 16 (1.7)                       | 11 (1.2)                      | 23 (2.5)                       | 14 (1.5)        | 3 (0.3)         | 6 (0.7)         | 24 (2.6)                       |
| <b>Summary measure of Sexual violence</b>                                               | <b>120 (13.0: 10.83-15.17)</b> | <b>83(9.0: 7.15-10.8)</b>     | <b>89 (9.7: 7.79-11.61)</b>    | <b>34 (3.7)</b> | <b>26 (2.8)</b> | <b>29 (3.1)</b> | <b>97 (10.5: 8.52-12.48)</b>   |
| <b>Controlling behaviour</b>                                                            |                                |                               |                                |                 |                 |                 |                                |
| He tries to keep you from seeing your friends                                           |                                |                               |                                |                 |                 |                 |                                |
| No                                                                                      |                                |                               | 852(93.8)                      |                 |                 |                 | 841(92.2)                      |
| Yes                                                                                     |                                |                               | 56(6.2)                        |                 |                 |                 | 71(7.8)                        |
| He tries to restrict contact with your family of birth                                  |                                |                               |                                |                 |                 |                 |                                |
| No                                                                                      |                                |                               | 882(96.6)                      |                 |                 |                 | 878(96.2)                      |
| Yes                                                                                     |                                |                               | 31 (3.4)                       |                 |                 |                 | 35(3.8)                        |
| He ignores you and treats you indifferently                                             |                                |                               |                                |                 |                 |                 |                                |
| No                                                                                      |                                |                               | 834( 92.2)                     |                 |                 |                 | 826(90.5)                      |
| Yes                                                                                     |                                |                               | 71 (7.8)                       |                 |                 |                 | 87(9.5)                        |
| He gets angry if you speak with another man                                             |                                |                               |                                |                 |                 |                 |                                |
| No                                                                                      |                                |                               | 776(89.4)                      |                 |                 |                 | 774(85.0)                      |
| Yes                                                                                     |                                |                               | 92(10.6)                       |                 |                 |                 | 137(15.0)                      |
| He is often suspicious that you were unfaithful                                         |                                |                               |                                |                 |                 |                 |                                |
| No                                                                                      |                                |                               | 841(93.1)                      |                 |                 |                 | 833(91.5)                      |
| Yes                                                                                     |                                |                               | 62(6.9)                        |                 |                 |                 | 77(8.5)                        |
| He expects you to ask his permission before seeking health care for yourself            |                                |                               |                                |                 |                 |                 |                                |
| No                                                                                      |                                |                               | 769(86.2)                      |                 |                 |                 | 759(83.4)                      |
| Yes                                                                                     |                                |                               | 123(13.8)                      |                 |                 |                 | 151(16.6)                      |
| He controls how you spent your money                                                    |                                |                               |                                |                 |                 |                 |                                |
| No                                                                                      |                                |                               | 822(91.7)                      |                 |                 |                 | 823(90.3)                      |
| Yes                                                                                     |                                |                               | 74(8.3)                        |                 |                 |                 | 88(9.7)                        |
| <b>Summary measure of Controlling behavior‡</b>                                         |                                |                               | <b>163 (20.0: 17.42-22.58)</b> |                 |                 |                 | <b>258(28.4: 25.49-31.31)</b>  |

\*Summary measures with prevalence rates and their 95% Confidence intervals

‡ Data for controlling behavior was available for periods: During pregnancy and after delivery only
